# Supplementary material for: Combined electrochemical and DFT investigations of iron selenide: a mechanically bendable solid-state symmetric supercapacitor
Source: Royal Society of Chemistry journal article supplement (doi:10.1039/d1se00074h), 2021-01-01
Supplement: d1se00074h1.pdf [file d1se00074h1.pdf]

## Supporting Information

### **Combined electrochemical and DFT investigations of iron selenide: a mechanically bendable solid-state symmetric supercapacitor**

**Bidhan Pandit<sup>1,2</sup>, Sachin R. Rondiya<sup>3</sup>, Shyamal Shegokar<sup>1</sup>, Lakshmana K.**

**Bommineedi<sup>1</sup>, Russel W. Cross<sup>3</sup>, Nelson Y. Dzade<sup>3</sup>, Babasaheb R. Sankapal<sup>1\*</sup>**

*<sup>1</sup>Nano Materials and Device Laboratory, Department of Physics, Visvesvaraya National Institute of Technology, South Ambazari Road, Nagpur 440010, Maharashtra, India.*

*<sup>2</sup>Department of Materials Science and Engineering and Chemical Engineering, Universidad Carlos III de Madrid, Avenida de la Universidad 30, 28911 Leganés, Madrid, Spain.*

*<sup>3</sup>School of Chemistry, Cardiff University, Main Building, Park Place, Cardiff, CF10 3AT, Wales, United Kingdom.*

#### **Corresponding author footnote**

**Babasaheb R. Sankapal**

E-mail: [brsankapal@phy.vnit.ac.in](mailto:brsankapal@phy.vnit.ac.in); [brsankapal@gmail.com](mailto:brsankapal@gmail.com)

Tel.: +91 (712) 2801170; Fax No.: +91 (712) 2223230

## Supporting Discussion

Specific capacitance from the CV curves was calculated with the help of following formula<sup>1</sup>:

$$C_s = \frac{1}{2mv\Delta V} \int_{V_i}^{V_f} I(V)dV \quad (1)$$

where, ' $C_s$ ' signifies the specific capacitance (F/g), ' $m$ ' indicates mass (g) deposited on SS substrate, ' $v$ ' specifies scan rate (V), ' $\Delta V$ ' is the functional potential frame and ' $\int_{V_i}^{V_f} I(V)dV$ ', represents area under the CV curve.

Specific capacitance ( $C_s$ ), specific energy (E) in Wh/kg and specific power (P) in W/kg from Galvanostatic charge-discharge can be calculated using following equations <sup>2</sup>:

$$C_s = \frac{I\Delta t}{m\Delta V} \quad (2)$$

$$E = \frac{1}{2} \left[ \frac{C_s \Delta V^2}{3.6} \right] \quad (3)$$

$$P = \frac{3600 \times E}{\Delta t} \quad (4)$$

where, ' $I$ ' represents current intensity and ' $\Delta t$ ' denotes discharge time (t) of the experimental charge-discharge curve.

For a two-electrode supercapacitor device, two electrodes are sandwiched with a separator in between them. In our case, the gel electrolyte works both as electrolyte and separator. So, the full cell is considered as the series combination of two capacitors. Hence,

the total capacitance ( $C_{cell}$ ) is calculated according to Equation (5), in which  $C_+$  and  $C_-$  are the capacitances of the associated two electrodes, respectively:

$$\frac{1}{C_{cell}} = \frac{1}{C_+} + \frac{1}{C_-} \quad (5)$$

For a symmetric system,  $C_+ = C_- = C_{electrode}$

$$\text{So, } C_{cell} = \frac{C_{electrode}}{2} \quad (6)$$

$$\text{Cell specific capacitance: } C_{SP, cell} = \frac{C_{cell}}{m_{total}} = \frac{C_{electrode}}{2} * \frac{1}{2 * m_{electrode}} = \frac{C_{SP, electrode}}{4} \quad (7)$$

Where  $m_{total}$  is the total mass ( $m_+ + m_-$ ) involved in cell.

As the cell configuration is symmetric,  $m_+ = m_- = m_{electrode}$ .

So,  $m_+ + m_- = 2 * m_{electrode}$ .

And again,  $C_{SP, electrode} = C_{electrode} / m_{electrode}$ .

So, it is obvious that the total specific capacitance of cell (2-electrode) will always one-fourth of the associated 3-electrode system.<sup>3</sup>

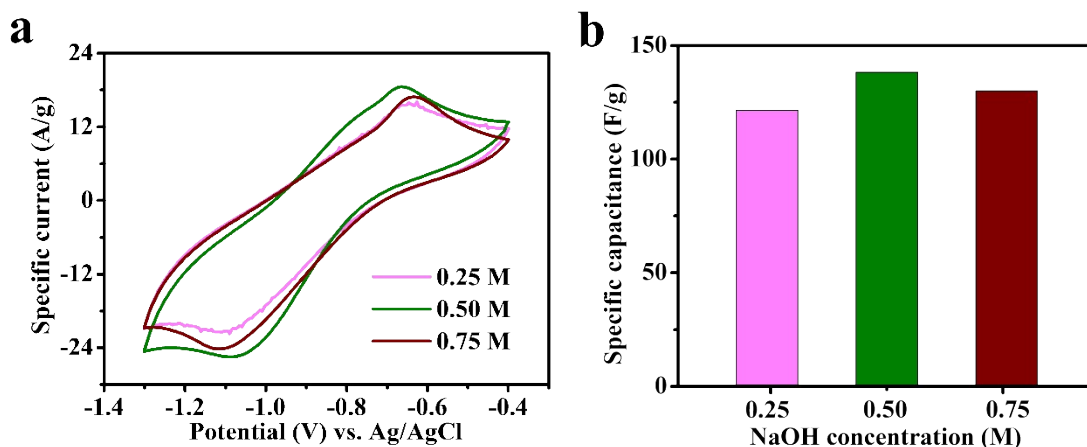

**Figure S1** (a) CV curves for various NaOH concentrations. (b) Specific capacitance with associated NaOH concentrations.

The aqueous electrolyte concentration (NaOH) was changed to get optimized electrochemical behavior at scan rate of 100 mV/s with the potential window between -0.4 to -1.3 V (**Figure S1a**). The electrode shows maximum specific capacitance at 0.5 M NaOH aqueous electrolyte as shown in **Figure S1b**. Low concentration (0.25 M) can't provide sufficient electrolyte ions for electrochemical activities, whereas higher concentration (0.75 M) causes lower ionic mobility due to less water hydration, demonstrating capacitance drop in both the cases.<sup>4</sup>

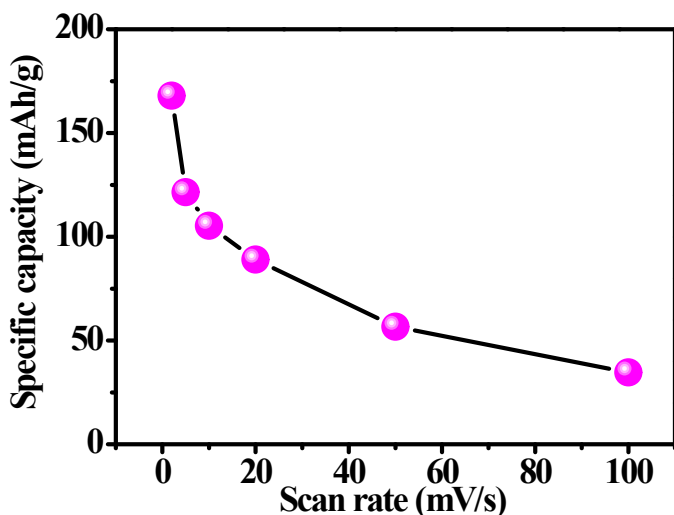

**Figure S2** Specific capacity vs. scan rate plot of FeSe<sub>2</sub> electrode.

Moreover, the battery redox characteristics are totally different and more complex than pseudocapacitors. Here we are adding the mechanism of FeSe<sub>2</sub> electrode for Na-ion battery to distinguish from pseudocapacitor point of view. At scan rate of 2 mV/s, the same FeSe<sub>2</sub> electrode exhibits 167.9 mAh/g (**Figure S2**) which is very low from the theoretical capacity as anode point of view. In comparison to pseudocapacitive mechanism, the charge-discharge mechanism here is associated with conversion reactions.<sup>5</sup> In initial discharge, FeSe<sub>2</sub> reacts with Na<sup>+</sup> to form Se (elemental) and Na<sub>x</sub>Fe<sub>3</sub>Se<sub>4</sub>. In the following conversion reaction, Na<sub>x</sub>Fe<sub>3</sub>Se<sub>4</sub> reacts with Na<sup>+</sup> to generate Na<sub>2</sub>Se and Fe. During the charge step, initially formed Fe is transformed to the final product of Fe<sub>3</sub>Se<sub>4</sub>. In the next cycle, the conversion reaction among Fe<sub>3</sub>Se<sub>4</sub> and Na<sub>2</sub>Se occurs. So, the starting material FeSe<sub>2</sub> will never be get back after the 1<sup>st</sup> cycle.<sup>6</sup>

During discharge:

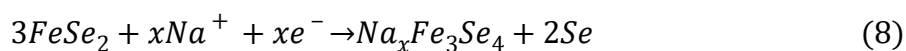

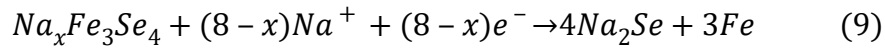

During charge:

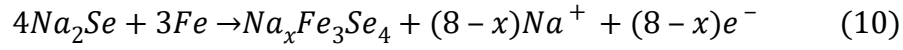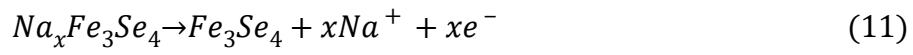

Even this electrochemical reaction mechanism is confirmed by the *in situ* XRD studies by Ge et al.<sup>5</sup>

**Table S1: Gel electrolyte based symmetric solid-state supercapacitor devices**

| Electrode materials                     | Electrolyte                         | Voltage window (V) | Specific capacitance (F/g) | Maximum Specific energy (Wh/kg) | Maximum Specific power (kW/kg) | Cyclic stability |        | Ref.                |
|-----------------------------------------|-------------------------------------|--------------------|----------------------------|---------------------------------|--------------------------------|------------------|--------|---------------------|
|                                         |                                     |                    |                            |                                 |                                | Retention (%)    | Cycles |                     |
| Porous carbon                           | PVA-KOH                             | 0.8                | 81.3                       | 7.22                            | 0.1                            | ~90.2            | 6000   | 7                   |
| rGO-PEDOT/PSS                           | PVA-H <sub>3</sub> PO <sub>4</sub>  | 1                  | 448 mF/cm <sup>2</sup>     | 2.83                            | 3.5895                         | 95               | 10000  | 8                   |
| GO/PPy                                  | LiCl-PVA                            | 0.8                | 347.8 mF/cm <sup>2</sup>   | 15.1                            | 4                              | 86               | 2000   | 9                   |
| MoS <sub>2</sub> /carbon cloth          | LiCl-PVA                            | 1.6                | 368                        | 5.42                            | 0.128                          | 96.5             | 5000   | 10                  |
| ZnS/CNTs                                | PVA-KOH                             | 1                  | 159.6                      | 22.3                            | 5                              | 91.8             | 3000   | 11                  |
| SWCNTs/RuO <sub>2</sub>                 | H <sub>3</sub> PO <sub>4</sub> -PVA | 1                  | 138                        | 18.8                            | 96                             | -                | -      | 12                  |
| PEDOT:PSS/MWCNT                         | PVA-KOH                             | 1                  | 380                        | 13.2                            | 4.99                           | 90               | 1000   | 13                  |
| MWCNTs                                  | PVA-H <sub>3</sub> PO <sub>4</sub>  | 1                  | 26.8 F/g                   | 3.5                             | 28.1                           | 92               | 5000   | 14                  |
| Waste paper fibers-RGO-MnO <sub>2</sub> | PVA-Na <sub>2</sub> SO <sub>4</sub> | 0.8                | 220                        | 19.6                            | 2.4                            | 85.3             | 2000   | 15                  |
| ZnCo <sub>2</sub> O <sub>4</sub> /rGO   | PVA-KOH                             | 0.4                | 143                        | 11.44                           | 1.382                          | 93.4             | 5000   | 16                  |
| NiS                                     | PVA-LiClO <sub>4</sub>              | 1.2                | 55.83                      | 9.3                             | 0.67                           | 90               | 1500   | 17                  |
| V <sub>2</sub> O <sub>5</sub>           | PVA-LiClO <sub>4</sub>              | 1.8                | 358                        | 43                              | 3.604                          | 88               | 1000   | 18                  |
| V <sub>2</sub> O <sub>5</sub> /MWCNTs   | PVA-LiClO <sub>4</sub>              | 1.8                | 629                        | 72.07                           | 8.4                            | 96               | 4000   | 19                  |
| CuS                                     | PVA-LiClO <sub>4</sub>              | 1.6                | 172.5                      | 12                              | 1.75                           | 93               | 2000   | 20                  |
| VS <sub>2</sub> /MWCNTs                 | PVA-LiClO <sub>4</sub>              | 1.6                | 182                        | 42                              | 4.8                            | 93.2             | 5000   | 21                  |
| MnO <sub>2</sub>                        | PVA-LiClO <sub>4</sub>              | 1.6                | 110                        | 23                              | 7.692                          | 92               | 2200   | 22                  |
| MnO <sub>2</sub>                        | PVA-LiCl                            | 0.8                | 776                        | -                               | -                              | 91               | 20000  | 23                  |
| MWCNTs/MnO <sub>2</sub>                 | PVA-Na <sub>2</sub> SO <sub>4</sub> | 1                  | 204                        | 28.33                           | -                              | 80.36            | 2500   | 24                  |
| Graphene/polyaniline                    | PVA-H <sub>2</sub> SO <sub>4</sub>  | 0.8                | 665                        | -                               | -                              | 100              | 10000  | 7                   |
| SWCNTs/TiO <sub>2</sub>                 | PVA-LiCl                            | 0.8                | 28                         | -                               | 66.7                           | 100              | 1000   | 25                  |
| <b>FeSe<sub>2</sub></b>                 | <b>PVA-LiClO<sub>4</sub></b>        | <b>1.8</b>         | <b>65.3</b>                | <b>13.4</b>                     | <b>5.1</b>                     | -                | -      | <b>Present work</b> |

## References

1. C. Niu, G. Han, H. Song, S. Yuan and W. Hou, *J. Colloid Interface Sci.*, 2020, **561**, 117-126.
2. S. Maitra, R. Mitra and T. K. Nath, *Curr. Appl. Phys.*, 2020, **20**, 628-637.
3. S. Roldan, D. Barreda, M. Granda, R. Menendez, R. Santamaria and C. Blanco, *Phys. Chem. Chem. Phys.*, 2015, **17**, 1084-1092.
4. K.-C. Tsay, L. Zhang and J. Zhang, *Electrochim. Acta*, 2012, **60**, 428-436.
5. J. Ge, B. Wang, J. Wang, Q. Zhang and B. Lu, *Adv. Energy Mater.*, 2020, **10**, 1903277.
6. Q. Yu, B. Jiang, J. Hu, C.-Y. Lao, Y. Gao, P. Li, Z. Liu, G. Suo, D. He, W. Wang and G. Yin, *Adv. Sci.*, 2018, **5**, 1800782.
7. X. Li, K. Liu, Z. Liu, Z. Wang, B. Li and D. Zhang, *Electrochim. Acta*, 2017, **240**, 43-52.
8. Y. Liu, B. Weng, J. M. Razal, Q. Xu, C. Zhao, Y. Hou, S. Seyedin, R. Jalili, G. G. Wallace and J. Chen, *Sci. Rep.*, 2015, **5**, 17045.
9. J. Cao, Y. Wang, J. Chen, X. Li, F. C. Walsh, J.-H. Ouyang, D. Jia and Y. Zhou, *J. Mater. Chem. A*, 2015, **3**, 14445-14457.
10. M. S. Javed, S. Dai, M. Wang, D. Guo, L. Chen, X. Wang, C. Hu and Y. Xi, *J. Power Sources*, 2015, **285**, 63-69.
11. X. Hou, T. Peng, J. Cheng, Q. Yu, R. Luo, Y. Lu, X. Liu, J.-K. Kim, J. He and Y. Luo, *Nano Res.*, 2017, **10**, 2570-2583.
12. P. Chen, H. Chen, J. Qiu and C. Zhou, *Nano Res.*, 2010, **3**, 594-603.
13. D. Zhao, Q. Zhang, W. Chen, X. Yi, S. Liu, Q. Wang, Y. Liu, J. Li, X. Li and H. Yu, *ACS Appl. Mater. Interfaces*, 2017, **9**, 13213-13222.



14. S. Li, C. Xuebo, L. Lei, W. Qiaodi, Y. Huating, G. Li, M. Changjie, S. Jiming, Z. Shengyi and N. Helin, *Adv. Funct. Mater.*, 2017, **27**, 1700474.
15. H. Su, P. Zhu, L. Zhang, F. Zhou, G. Li, T. Li, Q. Wang, R. Sun and C. Wong, *J. Electroanal. Chem.*, 2017, **786**, 28-34.
16. M. I. Kyu, Y. Seonno and O. Jungwoo, *Chem. Eur. J.*, 2017, **23**, 597-604.
17. A. M. Patil, A. C. Lokhande, N. R. Chodankar, V. S. Kumbhar and C. D. Lokhande, *Mater. Des.*, 2016, **97**, 407-416.
18. B. Pandit, D. P. Dubal and B. R. Sankapal, *Electrochim. Acta*, 2017, **242**, 382-389.
19. B. Pandit, D. P. Dubal, P. Gómez-Romero, B. B. Kale and B. R. Sankapal, *Sci. Rep.*, 2017, **7**, 43430.
20. A. M. Patil, A. C. Lokhande, N. R. Chodankar, P. A. Shinde, J. H. Kim and C. D. Lokhande, *J. Ind. Eng. Chem.*, 2017, **46**, 91-102.
21. B. Pandit, S. S. Karade and B. R. Sankapal, *ACS Appl. Mater. Interfaces*, 2017, **9**, 44880-44891.
22. N. R. Chodankar, D. P. Dubal, G. S. Gund and C. D. Lokhande, *Journal of Energy Chemistry*, 2016, **25**, 463-471.
23. R. Soni, A. Raveendran and S. Kurungot, *Nanoscale*, 2017, **9**, 3593-3600.
24. N. R. Chodankar, S.-H. Ji and D.-H. Kim, *J. Taiwan Inst. Chem. Engrs.*, 2017, **80**, 503-510.
25. C. Chen, C. Jun, L. Qiongqiong, W. Xinyu, S. Li, N. Zhiqiang and C. Jun, *Adv. Funct. Mater.*, 2017, **27**, 1604639.
